# Supplementary material for: Sequential on–off–on detection of Fe2+ and enantiomeric l-lysine with logic gate operation based on fluorescent carbon dots derived from a zinc–amine complex
Source: Royal Society of Chemistry journal article supplement (doi:10.1039/d3nj04046a), 2023-01-01
Supplement: d3nj04046a1.pdf [file d3nj04046a1.pdf]

## Electronic supplementary Information

### Sequential on-off-on detection of Fe<sup>2+</sup> and enantiomeric L-lysine with logic gate operation based on carbon dots derived from zinc-amine complexes

Xinlei Zhang, Peng Liu, Yuchi Zhang, Bohan Li, Yan Xu\*

Department of Chemistry, College of Sciences, Northeastern University, Shenyang, Liaoning 110819, China.

\*Corresponding Author:

xuyan@mail.neu.edu.cn (Yan Xu)

## Cell imaging

The viability of HeLa cells was determined by a standard methyl thiazolium tetrazolium (MTT) assay. Briefly, cells (5000 cells per well) were inoculated into each well of a 96-well culture dish and cultured in 100 mL DMEM at 37°C in 5% CO<sub>2</sub>. After culturing the cells for 24 h, different concentrations of Zn-CDs were added to the cells and incubated for another 24 h. Cells were washed three times with PBS to remove excess carbon spots, MTT reagent in PBS (20 mL, 5 mg mL<sup>-1</sup>) was added to each well and incubated for another 4 h at 37 °C. Finally, the formed purple crystals were dissolved in DMSO (150 mL) for 20 min at room temperature. The absorbance of each well at 490 nm was measured using a microplate reader.

HeLa cells were placed on culture dishes and incubated overnight in DMEM equipped with 10% fetal bovine serum in an air atmosphere containing 5% CO<sub>2</sub>. Zn-CDs (100 µg/mL) were added to the culture dishes and the cells were incubated at 37 °C. After 20 min, the mixed medium was removed and the cells were washed three times with PBS buffer (pH = 7). Images were captured using laser scanning confocal microscopy (LSCM). Then, the above cells were incubated with Fe<sup>2+</sup> (100 µM) in a Petri dish for another 20 min, followed by the addition of L-Lys/D-Lys (200 µM) for 15 min. These images were taken by LSCM.

## Temperature sensing related calculations

Absolute sensitivity ( $S_a$ ) and relative sensitivity ( $S_r$ ) are two important parameters in evaluating the temperature-sensing behaviors of optical thermometers. The  $S_a$  and  $S_r$  can be calculated from the following equations (1-2):

$$S_a = \left| \frac{\partial \Delta}{\partial T} \right| \quad \backslash * \text{MERGEFORMAT (1)}$$

$$S_r = \left| \frac{S_a}{\Delta} \right| \quad \backslash * \text{MERGEFORMAT (2)}$$

where  $\Delta$  is used to represent the PL intensity ratio  $I_{423 \text{ nm}}/ I_0$ , and T is the temperature. Additionally, the temperature resolution ( $\delta T$ ) is another key parameter for evaluating the sensitivity of optical thermometers for practical applications, which can be calculated according to the following equation (3):

$$\delta T = \frac{1}{S_r} \frac{\partial \Delta}{\Delta} \quad \backslash * \text{MERGEFORMAT (3)}$$

in which the signal-to-noise ratio of the fluorescence spectrometer used is 16000:1, that is to say, the value of  $\delta \Delta/\Delta$  is about 0.0125% (Cao et al. 2021).

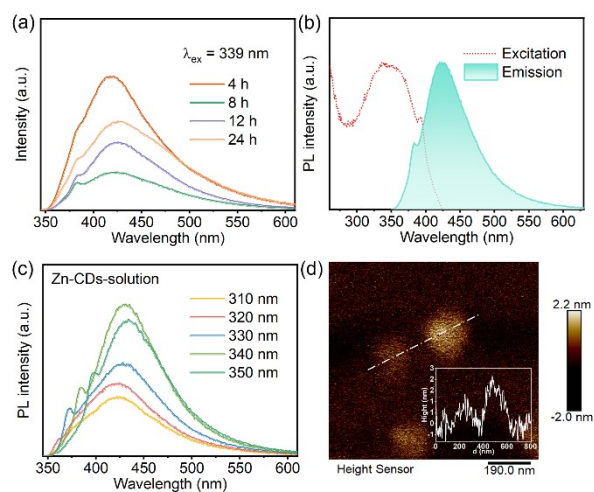

**Fig. S1.** (a) PL spectra of Zn-CDs ( $1 \text{ mg mL}^{-1}$ ) prepared from different hydrothermal reaction times; (b) Photoluminescent excitation (PLE) and emission spectra of Zn-CDs; (c) PL emission spectra of Zn-CDs aqueous solution under different excitation wavelengths; (d) AFM image and height profile of Zn-CDs.

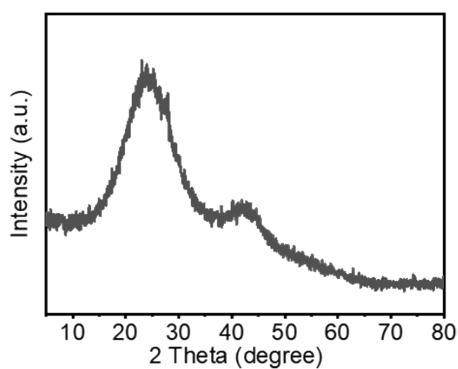

**Fig. S2.** X-ray diffraction pattern of Zn-CDs.

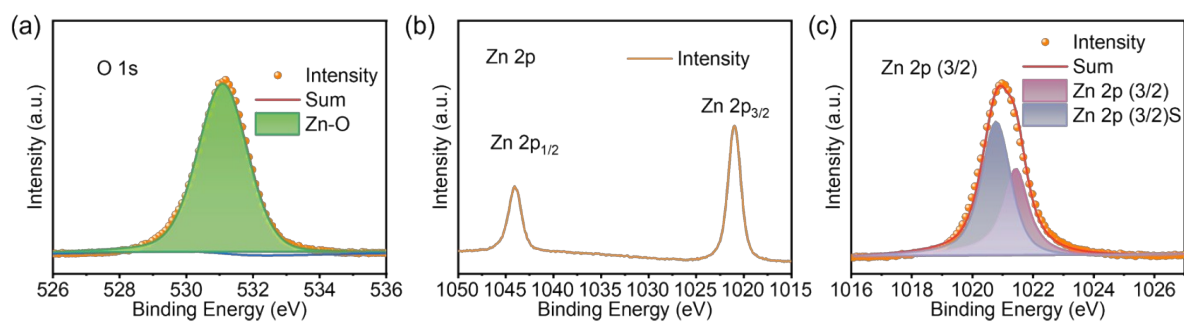

**Fig. S3.** XPS spectra of Zn-CDs (a) O 1s (b) Zn 2p and (c) Zn 2p (3/2).

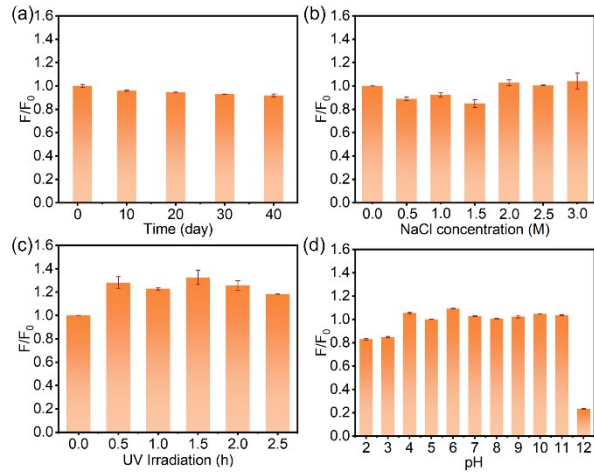

**Fig. S4.** PL intensity variation of  $F/F_0$  ( $F$  and  $F_0$  are the fluorescence intensity at  $\sim 423$  nm with the presence and absence of different conditions, respectively) for Zn-CDs aqueous solution under different conditions of: (a) left time, (b) NaCl concentration, (c) UV irradiation hour, and (d) pH ( $\lambda_{ex} = 339$  nm).

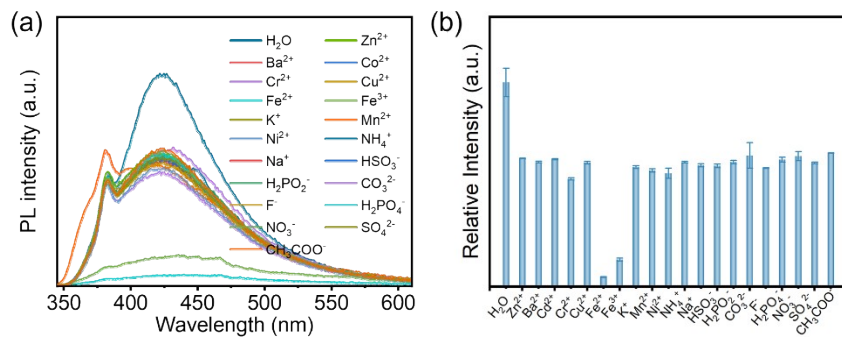

**Fig. S5.** (a) The PL emission spectra of 1 mM Zn-CDs in aqueous solution with the presence of various ions with a concentration of 1mM; (b) Effect of various ions on the PL emission intensity of Zn-CDs.

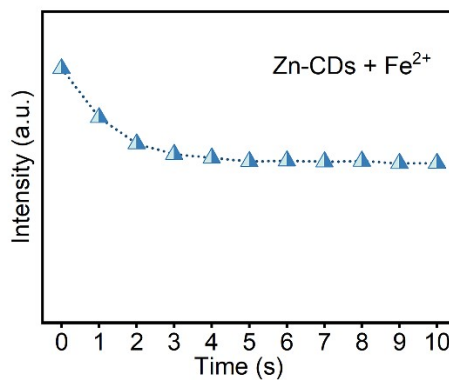

**Fig. S6.** Fluorescence response time of the sensor for  $Fe^{2+}$  detection. The fluorescence intensity was recorded at a wavelength of 423nm.

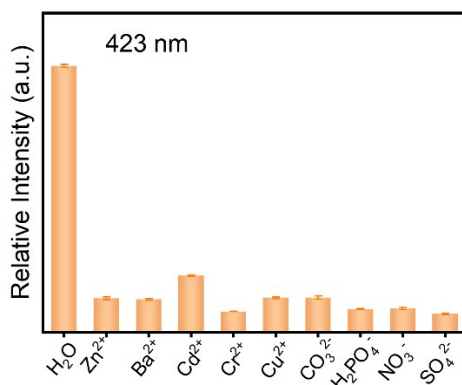

**Fig. S7.** The corresponding PL emission intensities of the Zn-CDs in pure H<sub>2</sub>O and the other ions solutions (1 mM) after introducing 20  $\mu$ L 3 mM of Fe<sup>2+</sup> solution.

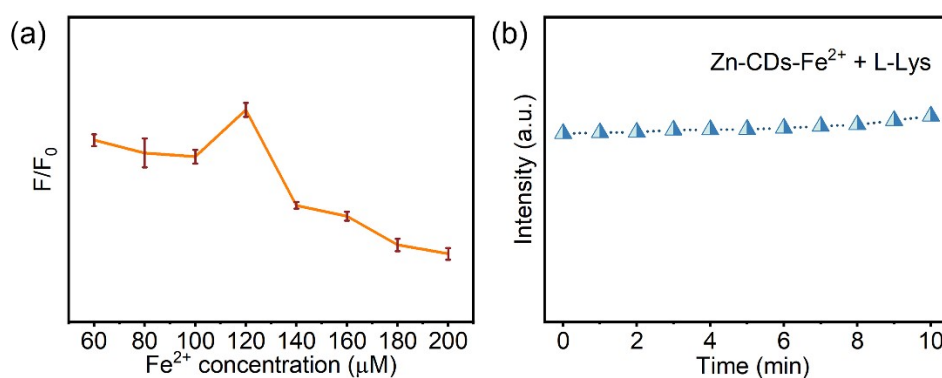

**Fig. S8.** (a) The influence of different concentrations of Fe<sup>2+</sup> on the fluorescence intensity recovery of the Zn-CDs-Fe<sup>2+</sup> system (the concentrations of the Zn-CDs and L-Lys were 1 mg/mL and 100  $\mu$ M, respectively); (b) Fluorescence response time of the sensor for L-Lys detection. The fluorescence intensity was recorded at a wavelength of 423nm.

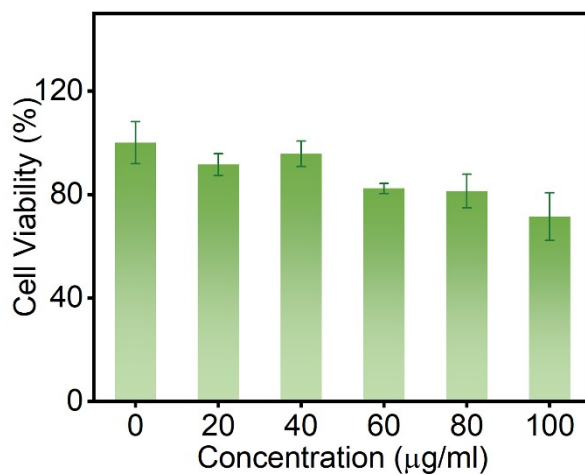

**Fig. S9.** Cell viabilities of HeLa cells treated with Zn-CDs under various concentrations (0-100  $\mu$ g mL<sup>-1</sup>) for 24 h.

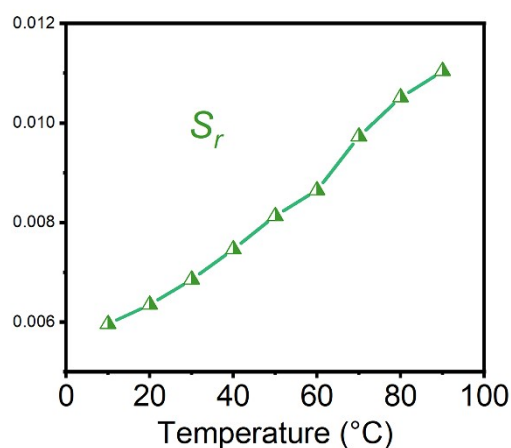

**Fig. S10.** Relative sensitivity of  $S_r$  versus temperature.

**Table S1** Comparison of detection limits of various materials used for the detection of  $Fe^{2+}$ .

| Materials <sup>#</sup>            | Method       | Linear range ( $\mu M$ ) | LOD ( $\mu M$ ) | Ref.      |
|-----------------------------------|--------------|--------------------------|-----------------|-----------|
| 2HPN                              | Fluorescent  | 0–125                    | 0.272           | 1         |
| Cellulose-based sensor containing | Colorimetric | 0-17.8                   | 0.89            | 2         |
| Carbon quantum dots (dopamine)    | Fluorescent  | 0-50                     | 0.038           | 3         |
| Polyethyleneiminehydrochloride    | Colorimetric | -                        | 25.5            | 4         |
| CDs (polyetherimide)              | Fluorescent  | 0-500                    | 0.051           | 5         |
| Zn-CDs ( $Zn(en)_3Cl_2$ )         | Fluorescent  | 0-120                    | 0.092           | This work |

Note<sup>#</sup>: 2HPN = 2-((3-hydroxyphenyl)amino)-3-(phenylthio)naphthalene-1,4-dione

**Table S2** Comparison of detection limits of different materials used for chiral L-Lys detection.

| Materials <sup>#</sup>                | Method          | Linear range ( $\mu M$ ) | LOD ( $\mu M$ ) | Ref.      |
|---------------------------------------|-----------------|--------------------------|-----------------|-----------|
| CQDs (ethylenediamine and L-cysteine) | Fluorescent     | 0-5000                   | 970             | 6         |
| MWCNT and $TiO_2$ NPs                 | Electrochemical | 0.5-5.5                  | 0.39            | 7         |
| CDs (neutral red and urea)            | Fluorescent     | 0-700                    | 0.019           | 8         |
| CDs (citric acid and L-Asp)           | Fluorescent     | 0-1000                   | 3.34            | 9         |
| CDs ( <i>Nigella sativa</i> seeds)    | Fluorescent     | 0-500                    | 0.453           | 10        |
| Zn-CDs ( $Zn(en)_3Cl_2$ )             | Fluorescent     | 0-120                    | 0.204           | This work |

Note<sup>#</sup>: CQDs = carbon quantum dots; CDs = carbon dots

**Table S3.** Comparison of the maximum relative sensitivity ( $S_r$ ) of Zn-CDs with the other related optical thermometers reported previously.

| Materials <sup>#</sup>                        | Sensitivity                    | Temperature range | Ref.      |
|-----------------------------------------------|--------------------------------|-------------------|-----------|
| CDs&RB@ZIF-82-MMM                             | 0.74% °C <sup>-1</sup> (20 °C) | 20-80 °C          | 11        |
| Cys-CDs                                       | 0.64% °C <sup>-1</sup> (70 °C) | 10-70 °C          | 12        |
| N, S-CDs                                      | 0.50% °C <sup>-1</sup> (80 °C) | 5-80 °C           | 13        |
| CDs@UiO-66(COOH) <sub>2</sub> -               | 0.82% °C <sup>-1</sup> (10 °C) | 10-80 °C          | 14        |
| TbTATAB⊃C460                                  | 4.484% °C <sup>-1</sup> (27    | -173-27 °C        | 15        |
| Zn-CDs (Zn(en) <sub>3</sub> Cl <sub>2</sub> ) | 1.10% °C <sup>-1</sup> (90 °C) | 10-90 °C          | This work |

Note<sup>#</sup>: RB = rhodamine B; MMM = mixed-matrix membranes; ZIF-82 = zeolitic-imidazolate-framework-82; Cys = L-Cysteine; TbTATAB = terbium-based MOFB (H<sub>3</sub>TATAB = 4,4',4''-s-triazine-1,3,5-triyltri-*p*-aminobenzoic acid); C460 = 7-diethylamino-4-methylcoumarin.

## References

1. P. Ravichandiran, A. Boguszewska-Czubara, M. Maslyk, A. P. Bella, S. A. Subramaniyan, P. M. Johnson, K. S. Shim, H. G. Kim and D. J. Yoo, *ACS Sustain. Chem. Eng.*, 2019, **7**, 17210-17219.
2. H. Nawaz, W. Tian, J. Zhang, R. Jia, Z. Chen and J. Zhang, *ACS Appl. Mater. Interfaces*, 2018, **10**, 2114-2121.
3. M. Lu and L. Zhou, *Mater. Sci. Eng. C*, 2019, **101**, 352-359.
4. M. Yıldız, N. Demir, H. Ünver and N. Sahiner, *Sensor. Actuat. B-Chem.*, 2017, **252**, 55-61.
5. S. Wei, L. Tan, X. Yin, R. Wang, X. Shan, Q. Chen, T. Li, X. Zhang, C. Jiang and G. Sun, *Analyst*, 2020, **145**, 2357-2366.
6. F. Copur, N. Bekar, E. Zor, S. Alpaydin and H. Bingol, *Sens. Actuators, B* 2019, **279**, 305-312.
7. M. B. Gholivand, M. Shamsipur and N. Amini, *Electrochim. Acta*, 2014, **123**, 569-575.
8. D. Chang, Z. Zhao, H. Shi, J. Feng, Y. Yang and L. Shi, *Sens. Actuators, B* 2022, **362**, 131792.
9. P. Gao, Z. Xie and M. Zheng, *Sensor. Actuat. B-Chem.*, 2020, **319**, 128265.
10. N. Sharma and K. Yun, *Dyes Pigm* , 2020, **182**, 108640.
11. Y. Ding, Y. Lu, K. Yu, S. Wang, D. Zhao and B. Chen, *Adv. Opt. Mater.*, 2021, **9**, 2100945.
12. Z. Guo, J. Luo, Z. Zhu, Z. Sun, X. Zhang, Z.-c. Wu, F. Mo and A. Guan, *Dyes Pigm.* , 2020, **173**, 107952.
13. P. Zuo, J. Liu, H. Guo, C. Wang, H. Liu, Z. Zhang and Q. Liu, *Anal. Bioanal.Chem.*, 2019, **411**, 1647-1657.
14. X. Zhang, P. Liu, B. Li, X. Li and Y. Xu, *New J. Chem.*, 2022, **46**, 13021-13029.
15. T. Xia, T. Song, Y. Cui, Y. Yang and G. Qian, *Dalton Trans.*, 2016, **45**, 18689-18695.
